# Supplementary material for: The Role of Post-Neoadjuvant Chemotherapy Tumor Volume for Prognostication and Treatment Guidance in Loco-Regionally Advanced Nasopharyngeal Carcinoma
Source: PubMed Central journal article supplement (PMC6893427; doi:10.3390/cancers11111632), 2019-10-24
Supplement: cancers-11-01632-s001.pdf [file cancers-11-01632-s001.pdf]

## Supplementary Materials

# The Role of Post-Neoadjuvant Chemotherapy Tumor Volume for Prognostication and Treatment Guidance in Loco-Regionally Advanced Nasopharyngeal Carcinoma

Fo-Ping Chen <sup>1,†</sup>, Dan-Wan Wen <sup>1,†</sup>, Feng Li <sup>1,†</sup>, Li Lin <sup>1</sup>, Jia Kou <sup>1</sup>, Wei-Hong Zheng <sup>1</sup>, Li Li <sup>2</sup>, Guan-Qun Zhou <sup>1</sup> and Ying Sun <sup>1,\*</sup>

## Supplementary Tables

**Table S1.** Multivariable analyses of T-, N-category and GTVp, GTVnd on clinical outcomes in loco-regionally advanced nasopharyngeal carcinoma, adjusted for age, gender, family history and treatment scheme.

|                           | HR (95%CI)       | p       |
|---------------------------|------------------|---------|
| <b>OS</b>                 |                  |         |
| T stage (T2 vs. T1)       | 1.17 (0.75–1.83) | 0.490   |
| T stage (T3 vs. T1)       | 1.19 (0.8–1.75)  | 0.390   |
| T stage (T4 vs. T1)       | 1.63 (1.07–2.47) | 0.022   |
| N stage (N1 vs. N0)       | 1.09 (0.73–1.63) | 0.676   |
| N stage (N2 vs. N0)       | 1.51 (0.99–2.29) | 0.053   |
| N stage (N3 vs. N0)       | 2.32 (1.51–3.56) | < 0.001 |
| GTVp (≥ 52cc vs. < 52cc)  | 1.63 (1.35–1.97) | < 0.001 |
| GTVnd (≥ 12cc vs. < 12cc) | 1.79 (1.49–2.14) | < 0.001 |
| <b>DFS</b>                |                  |         |
| T stage (T2 vs. T1)       | 1.03 (0.72–1.46) | 0.890   |
| T stage (T3 vs. T1)       | 1.13 (0.84–1.52) | 0.430   |
| T stage (T4 vs. T1)       | 1.55 (1.13–2.14) | 0.007   |
| N category (N1 vs. N0)    | 1.15 (0.85–1.57) | 0.366   |
| N category (N2 vs. N0)    | 1.48 (1.07–2.04) | 0.018   |
| N category (N3 vs. N0)    | 1.99 (1.43–2.77) | < 0.001 |
| GTVp (≥ 52cc vs. < 52cc)  | 1.45 (1.25–1.68) | < 0.001 |
| GTVnd (≥ 12cc vs. < 12cc) | 1.7 (1.48–1.96)  | < 0.001 |
| <b>DMFS</b>               |                  |         |
| T stage (T2 vs. T1)       | 1.06 (0.7–1.6)   | 0.780   |
| T stage (T3 vs. T1)       | 1.08 (0.76–1.54) | 0.680   |
| T stage (T4 vs. T1)       | 1.32 (0.9–1.95)  | 0.156   |
| N category (N1 vs. N0)    | 1.72 (1.01–2.91) | 0.046   |
| N category (N2 vs. N0)    | 2.77 (1.62–4.74) | < 0.001 |
| N category (N3 vs. N0)    | 4.01 (2.32–6.91) | < 0.001 |
| GTVp (≥ 52cc vs. < 52cc)  | 1.52 (1.26–1.84) | < 0.001 |
| GTVnd (≥ 12cc vs. < 12cc) | 1.73 (1.44–2.08) | < 0.001 |
| <b>LRFS</b>               |                  |         |
| T stage (T2 vs. T1)       | 1.01 (0.58–1.76) | 0.970   |
| T stage (T3 vs. T1)       | 1.1 (0.69–1.75)  | 0.700   |
| T stage (T4 vs. T1)       | 1.72 (1.05–2.83) | 0.031   |
| N category (N1 vs. N0)    | 1.07 (0.71–1.61) | 0.739   |
| N category (N2 vs. N0)    | 1.06 (0.69–1.64) | 0.782   |
| N category (N3 vs. N0)    | 1.22 (0.77–1.93) | 0.395   |
| GTVp (≥ 52cc vs. < 52cc)  | 1.23 (0.99–1.52) | 0.067   |
| GTVnd (≥ 12cc vs. < 12cc) | 1.61 (1.31–1.97) | < 0.001 |

Abbreviation: GTVp: primary gross tumor volume; GTVnd: cervical lymph node tumor volume; LRFS: loco-regional recurrence-free survival; DFS: disease-free survival; DMFS: distant metastasis-free survival; OS: and overall survival

16

**Table S2.** General characteristics of patients stratified by TNV risk stratification.

| Characteristic                  | Low Risk (n = 1,004) | Low-Intermediate Risk (n = 1,024) | Intermediate Risk (n = 825) | High Risk (n = 1,256) | p       |
|---------------------------------|----------------------|-----------------------------------|-----------------------------|-----------------------|---------|
| Age (years)                     |                      |                                   |                             |                       | < 0.001 |
| Median                          | 45                   | 43                                | 46                          | 43                    |         |
| IQR                             | 38–52                | 37–50                             | 38–53                       | 35–51                 |         |
| Sex, n (%)                      |                      |                                   |                             |                       | < 0.001 |
| Male                            | 697 (69.4%)          | 779 (76.1%)                       | 610 (73.9%)                 | 985 (78.4%)           |         |
| Female                          | 307 (30.6%)          | 245 (23.9%)                       | 215 (26.1%)                 | 271 (21.6%)           |         |
| Family history                  |                      |                                   |                             |                       | 0.351   |
| None                            | 751 (74.8%)          | 754 (73.6%)                       | 637 (77.2%)                 | 948 (75.5%)           |         |
| Yes                             | 253 (25.2%)          | 270 (26.4%)                       | 188 (22.8%)                 | 308 (24.5%)           |         |
| WHO histologic type, n (%)      |                      |                                   |                             |                       | 0.736   |
| I                               | 8 (0.8%)             | 4 (0.4%)                          | 5 (0.6%)                    | 7 (0.6%)              |         |
| II                              | 22 (2.2%)            | 26 (2.5%)                         | 14 (1.7%)                   | 23 (1.8%)             |         |
| III                             | 974 (97%)            | 994 (97.1%)                       | 806 (97.7%)                 | 1226 (97.6%)          |         |
| T category, n (%)               |                      |                                   |                             |                       | < 0.001 |
| T1                              | 42 (4.2%)            | 74 (7.2%)                         | 13 (1.6%)                   | 86 (6.8%)             |         |
| T2                              | 48 (4.8%)            | 99 (9.7%)                         | 23 (2.8%)                   | 143 (11.4%)           |         |
| T3                              | 736 (73.3%)          | 798 (77.9%)                       | 63 (7.6%)                   | 597 (47.5%)           |         |
| T4                              | 178 (17.7%)          | 53 (5.2%)                         | 726 (88%)                   | 430 (34.2%)           |         |
| N category, n (%)               |                      |                                   |                             |                       | < 0.001 |
| N0                              | 144 (14.3%)          | 35 (3.4%)                         | 94 (11.4%)                  | 0 (0%)                |         |
| N1                              | 574 (57.2%)          | 479 (46.8%)                       | 451 (54.7%)                 | 281 (22.4%)           |         |
| N2                              | 286 (28.5%)          | 497 (48.5%)                       | 129 (15.6%)                 | 327 (26%)             |         |
| N3                              | 0 (0%)               | 13 (1.3%)                         | 151 (18.3%)                 | 648 (51.6%)           |         |
| Stage, n (%)                    |                      |                                   |                             |                       | < 0.001 |
| III                             | 826 (82.3%)          | 958 (93.6%)                       | 0 (0%)                      | 307 (24.4%)           |         |
| IV                              | 178 (17.7%)          | 66 (6.4%)                         | 825 (100%)                  | 949 (75.6%)           |         |
| GTVp (cm <sup>3</sup> ), n (%)  |                      |                                   |                             |                       | < 0.001 |
| <52                             | 1,004 (100%)         | 677 (66.1%)                       | 111 (13.5%)                 | 417 (33.2%)           |         |
| ≥52                             | 0 (0%)               | 347 (33.9%)                       | 714 (86.5%)                 | 839 (66.8%)           |         |
| GTVnd (cm <sup>3</sup> ), n (%) |                      |                                   |                             |                       | < 0.001 |
| <12                             | 1,004 (100%)         | 347 (33.9%)                       | 825 (100%)                  | 0 (0%)                |         |
| ≥12                             | 0 (0%)               | 677 (66.1%)                       | 0 (0%)                      | 1,256 (100%)          |         |
| Treatment, n (%)                |                      |                                   |                             |                       | < 0.001 |
| NACT+IMRT                       | 241 (24%)            | 206 (20.1%)                       | 148 (17.9%)                 | 183 (14.6%)           |         |
| NACT+CCRT                       | 763 (76%)            | 818 (79.9%)                       | 677 (82.1%)                 | 1,073 (85.4%)         |         |

17

18

19

20

Abbreviation: LRRFS: loco-regional relapse-free survival; DFS: disease-free survival; DMFS: distant metastasis-free survival; OS: and overall survival; NACT: neoadjuvant chemotherapy; CCRT: concurrent chemoradiotherapy; IMRT: Intensity-Modulated Radiation Therapy; GTVp: gross primary tumor volume; GTVnd: cervical lymph node volume.

**Table S3.** Comparing of AUC of TNV risk stratification with TNM categories, GTVp, and GTVnd.

|       | Overall Survival |                |                 | Disease-Free Survival |                |                 | Distant Metastasis-Free Survival |                |                 | Loco-Regional Relapse-Free Survival |                |                 |
|-------|------------------|----------------|-----------------|-----------------------|----------------|-----------------|----------------------------------|----------------|-----------------|-------------------------------------|----------------|-----------------|
|       | AUC              | 95% CI         | <i>p</i> -Value | AUC                   | 95% CI         | <i>p</i> -Value | AUC                              | 95% CI         | <i>p</i> -Value | AUC                                 | 95% CI         | <i>p</i> -Value |
| TNV   | 0.643            | 0.628 to 0.657 | Ref.            | 0.629                 | 0.614 to 0.644 | Ref.            | 0.652                            | 0.637 to 0.666 | Ref.            | 0.575                               | 0.559 to 0.590 | Ref.            |
| TNM   | 0.586            | 0.570 to 0.601 | < 0.001         | 0.580                 | 0.565 to 0.595 | < 0.001         | 0.586                            | 0.571 to 0.601 | < 0.001         | 0.560                               | 0.545 to 0.575 | 0.201           |
| T     | 0.541            | 0.526 to 0.557 | < 0.001         | 0.545                 | 0.530 to 0.560 | < 0.001         | 0.522                            | 0.507 to 0.537 | < 0.001         | 0.561                               | 0.545 to 0.576 | 0.376           |
| N     | 0.591            | 0.576 to 0.606 | < 0.001         | 0.576                 | 0.560 to 0.591 | < 0.001         | 0.621                            | 0.606 to 0.635 | 0.0063          | 0.513                               | 0.498 to 0.529 | < 0.001         |
| GTVp  | 0.565            | 0.550 to 0.580 | < 0.001         | 0.564                 | 0.548 to 0.579 | < 0.001         | 0.561                            | 0.545 to 0.576 | < 0.001         | 0.550                               | 0.534 to 0.565 | 0.032           |
| GTVnd | 0.583            | 0.568 to 0.598 | < 0.001         | 0.578                 | 0.563 to 0.593 | < 0.001         | 0.596                            | 0.581 to 0.612 | < 0.001         | 0.539                               | 0.523 to 0.554 | 0.001           |

Abbreviation: AUC: the area under the receiver operating characteristic curve; CI: confidence interval; GTVp: gross tumor volume; GTVnd: cervical lymph node volume.

Supplementary Figures

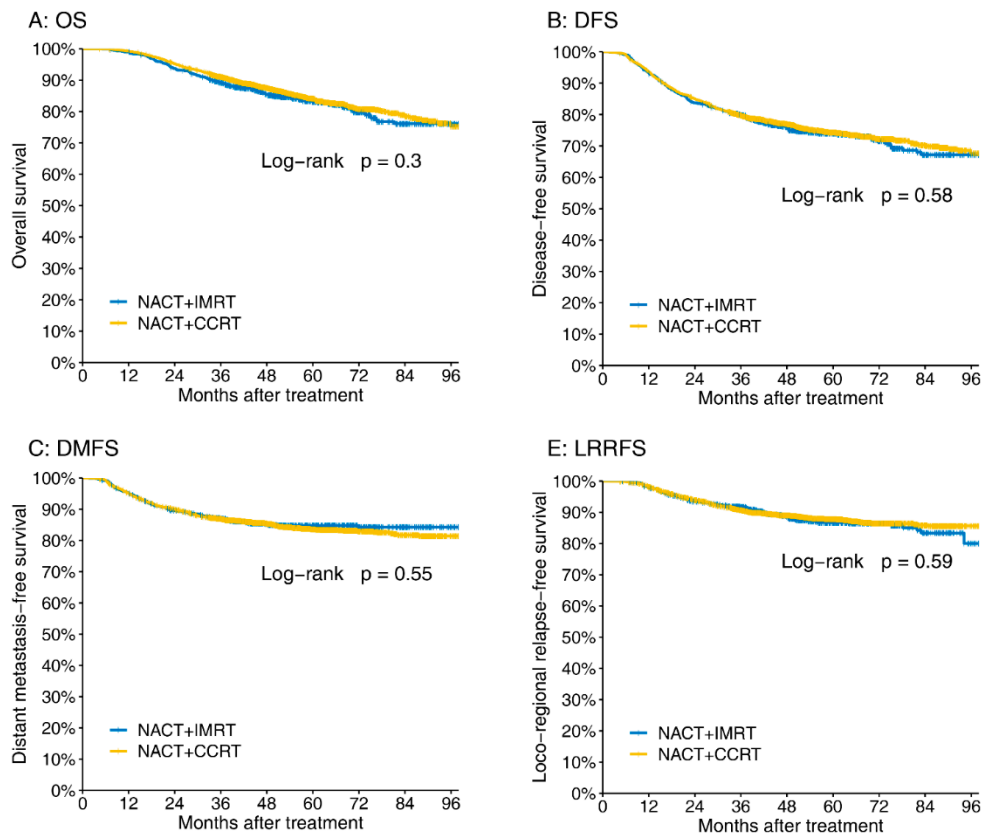

**Figure S1.** Comparison of the survival rates of NACT + CCRT vs. NACT + IMRT with regard to (A) overall survival, (B) disease-free survival, (C) distant metastasis-free survival, and (D) loco-regional relapse-free survival in 4,109 patients.

**A** Overall survival

| Risk group            | NACT+IMRT       |               | NACT+CCRT       |               | HR (95% CI)      |
|-----------------------|-----------------|---------------|-----------------|---------------|------------------|
|                       | No. of Patients | No. of Events | No. of Patients | No. of Events |                  |
| Low Risk              | 241             | 12 (5.0%)     | 763             | 52 (6.8%)     | 1.60 (0.84-3.07) |
| Low-intermediate Risk | 206             | 30 (14.6%)    | 818             | 99 (12.1%)    | 0.80 (0.53-1.20) |
| Intermediate Risk     | 148             | 38 (25.7%)    | 677             | 113 (16.7%)   | 0.68 (0.47-0.99) |
| High Risk             | 183             | 55 (30.1%)    | 1,073           | 246 (22.9%)   | 0.73 (0.55-0.97) |

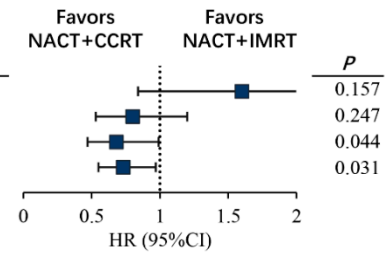

**B** Disease-free survival

| Risk group            | NACT+IMRT       |               | NACT+CCRT       |               | HR (95% CI)      |
|-----------------------|-----------------|---------------|-----------------|---------------|------------------|
|                       | No. of Patients | No. of Events | No. of Patients | No. of Events |                  |
| Low Risk              | 241             | 31 (12.9%)    | 763             | 107 (14.0%)   | 1.15 (0.76-1.72) |
| Low-intermediate Risk | 206             | 52 (25.2%)    | 818             | 167 (20.4%)   | 0.79 (0.58-1.07) |
| Intermediate Risk     | 148             | 49 (33.1%)    | 677             | 180 (26.6%)   | 0.81 (0.59-1.12) |
| High Risk             | 183             | 75 (41.0%)    | 1,073           | 385 (35.9%)   | 0.85 (0.67-1.09) |

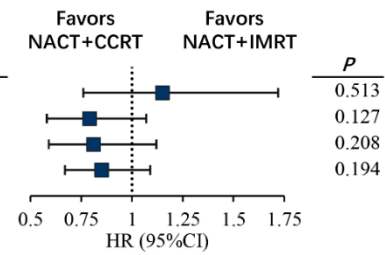

**C** Distant metastasis-free survival

| Risk group            | NACT+IMRT       |               | NACT+CCRT       |               | HR (95% CI)      |
|-----------------------|-----------------|---------------|-----------------|---------------|------------------|
|                       | No. of Patients | No. of Events | No. of Patients | No. of Events |                  |
| Low Risk              | 241             | 16 (6.6%)     | 763             | 52 (6.8%)     | 1.11 (0.62-1.97) |
| Low-intermediate Risk | 206             | 29 (14.1%)    | 818             | 106 (13.0%)   | 0.90 (0.60-1.36) |
| Intermediate Risk     | 148             | 31 (20.9%)    | 677             | 108 (16.0%)   | 0.78 (0.52-1.16) |
| High Risk             | 183             | 55 (30.1%)    | 1,073           | 279 (26.0%)   | 0.84 (0.63-1.13) |

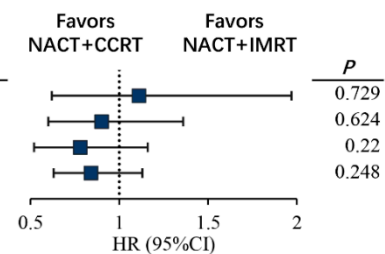

**D** Loco-regional relapse-free survival

| Risk group            | NACT+IMRT       |               | NACT+CCRT       |               | HR (95% CI)      |
|-----------------------|-----------------|---------------|-----------------|---------------|------------------|
|                       | No. of Patients | No. of Events | No. of Patients | No. of Events |                  |
| Low Risk              | 241             | 18 (7.5%)     | 763             | 68 (8.9%)     | 1.23 (0.73-2.08) |
| Low-intermediate Risk | 206             | 32 (15.5%)    | 818             | 86 (10.5%)    | 0.67 (0.45-1.02) |
| Intermediate Risk     | 148             | 28 (18.9%)    | 677             | 98 (14.5%)    | 0.78 (0.51-1.20) |
| High Risk             | 183             | 32 (17.5%)    | 1,073           | 172 (16.0%)   | 0.86 (0.60-1.25) |

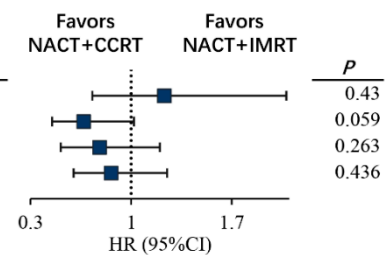

**Figure S2.** Comparison of benefit of NACT + CCRT vs. NACT + IMRT with regard to (A) overall survival, (B) disease-free survival, (C) distant metastasis-free survival, and (D) loco-regional relapse-free survival in patients stratified by TNV groupings.
